# Supplementary material
Source: PubMed Central journal article supplement (PMC2849082)
Supplement: mmc1.pdf [file mmc1.pdf]

Supporting Materials - JP Dilger - Monte Carlo Simulation of Buffered Diffusion ...  
Biophysical Journal, Volume 98

## **Supporting Material**

### **Monte Carlo Simulation of Buffered Diffusion Into and Out of a Model Synapse**

James P. Dilger

6 supplementary figures

3 supplementary movies (captions in this document)

### Movie S1

The onset phase of ligand diffusion into the model synapse (Figure 1) containing a high density of receptors. The movie runs in real time. The parameters listed in Table 1 were used for the simulation; Fig. 2 is a graphical display of the same simulation. Green and red dots represent unliganded and liganded receptors respectively.

### Movie S2

The recovery phase of ligand diffusion out of the model synapse (Fig. 1) containing a high density of receptors. The movie is a continuation of Supplementary Movie 1. It begins at  $t = 5$  s when the external ligand concentration is clamped to zero. The movie runs in real time between  $t=5-20$  s and is speeded up 30x between  $t=20-100$  s. Fig. 3 is a graphical display of the same simulation. Green and red dots represent unliganded and liganded receptors respectively.

### Movie S3

The diffusion of an irreversible ligand into the model synapse (Fig. 1) containing a high density of receptors. The movie runs in real time. The parameters listed in Table 1 were used for the simulation except that  $\lambda_{-}=0$ ; Fig. 8 is a graphical display of the same simulation. Green and red dots represent unliganded and liganded receptors respectively.

### Fig. S1

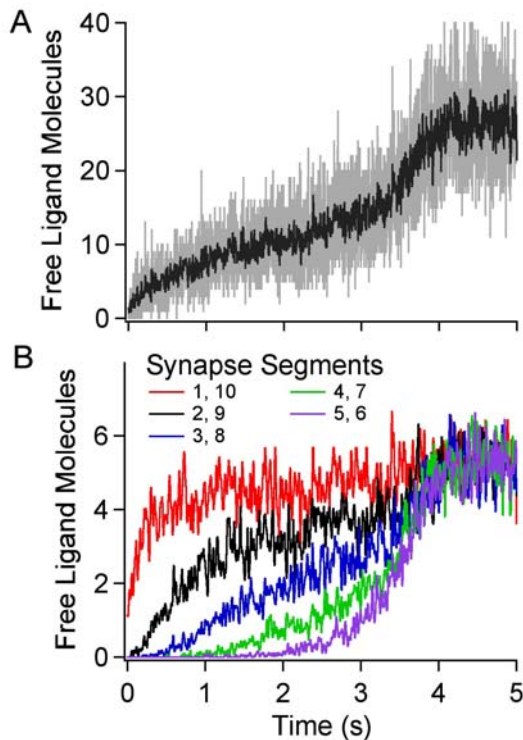

Free ligands during the onset phase of buffered diffusion. The Simulation parameters are given in Table 1. Fig. 2 in the paper shows the corresponding receptor occupancy graphs.

A. Free ligands within synapse as a function of time. The gray trace shows the actual number, the black trace has been smoothed for purpose of display with a sliding average of 100 points.

B. Free ligands (smoothed with a sliding average of 100 points) as a function of time within the different segments of the box synapse.

**Fig. S2**

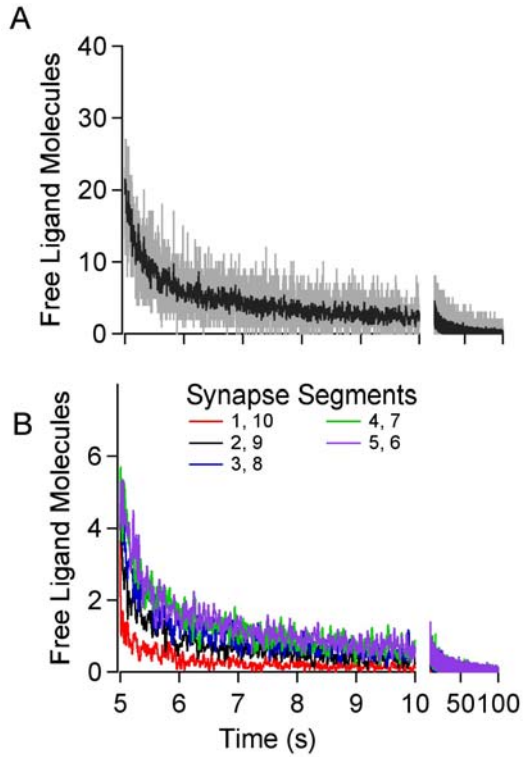

Free ligands during the recovery phase of buffered diffusion. The Simulation parameters are given in Table 1. Fig. 3 in the paper shows the corresponding receptor occupancy graphs.

A. Free ligands within synapse as a function of time. The gray trace shows the actual number, the black trace has been smoothed for purpose of display with a sliding average of 100 points.

B. Free ligands (smoothed with a sliding average of 100 points) as a function of time within the different segments of the box synapse.

**Fig. S3**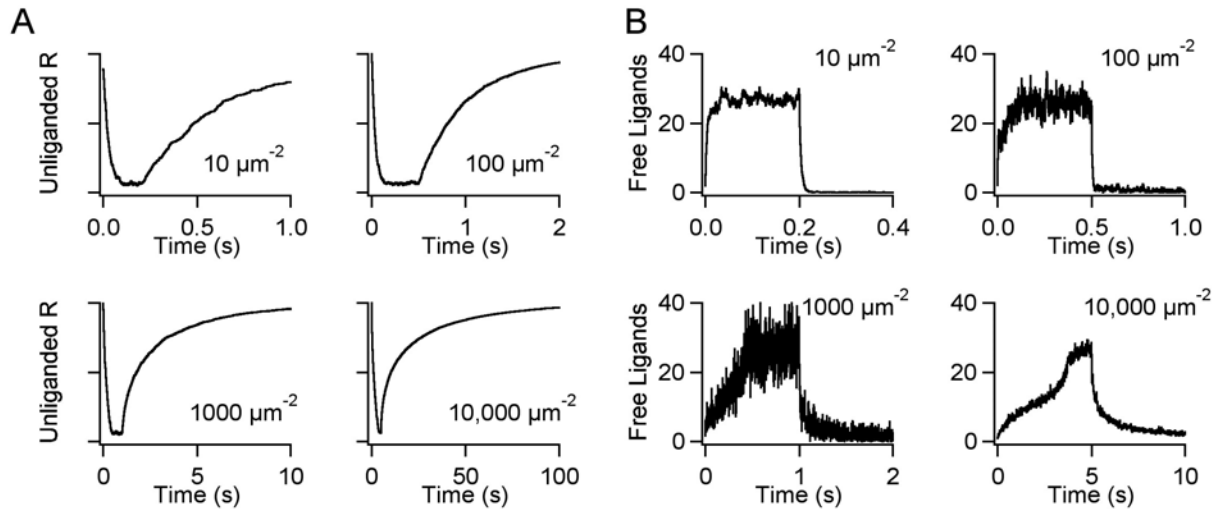

The effect of receptor density on receptor occupancy and free ligand concentration. Parameters are the same as shown in Table 1 except for receptor density. For low receptor density, the simulations were repeated with different random number seeds and the results averaged:  $10 \mu\text{m}^{-2}$  (20 simulations),  $30 \mu\text{m}^{-2}$  (10 simulations),  $100 \mu\text{m}^{-2}$  (5 simulations). After receptors were equilibrated with  $15xL_{eq}$  ligand, the external concentration was clamped to zero ligand at  $t=0.2, 0.5, 1.0$  and  $5.0$  s for densities of  $10, 100, 1000$  and  $10^4 \mu\text{m}^{-2}$  respectively. The time interval between displayed data points ranges from  $10 \mu\text{s}$  to  $1$  ms depending on the time scale. Fig. 4 in the paper shows the corresponding graphs of  $t_{0.5}$  vs density.

A. Unliganded receptors (R) as a function of time for different densities. Note the differences in time scales. The maximum number of unliganded receptors is 20, 200, 2000 and 20,000 respectively.

B. Free ligands as a function of time for different densities. The predicted number of free ligands in the synapse at equilibrium is 27. Traces show the smoothed average of 10 individual data points.

**Fig. S4**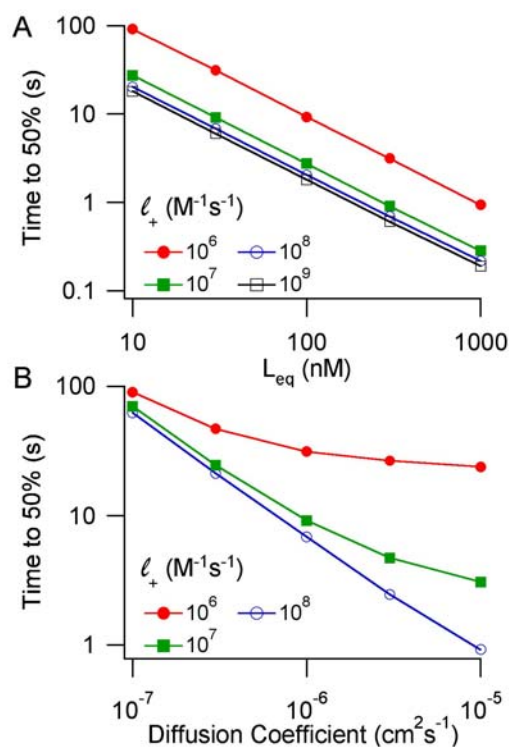

Effect of ligand affinity and diffusion coefficient on the recovery kinetics of receptor occupancy during buffered diffusion. Onset is shown in Fig. 5 of the paper.

**Fig. S5**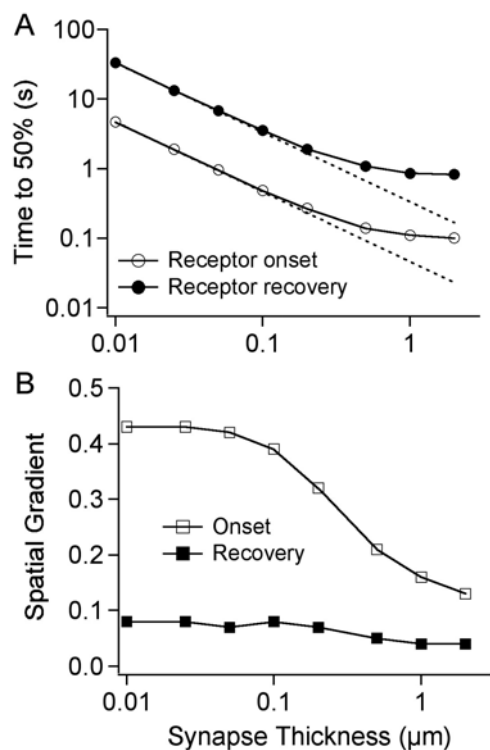

The effect of synapse dimensions on diffusion of ligands into and out of the box synapse. Conditions are the same as shown in Table 1 except for the synapse cleft thickness,  $t_{cleft}$ . Because the x-dimension of the synapse is  $1 \mu m$ , the synapse thickness /width ratio is equal to the gap size in  $\mu m$ .

A. The time needed to reach 50% of maximum receptor occupancy for onset and recovery simulations with different synapse thicknesses. Dashed lines correspond to a linear correlation for  $t_{cleft} \leq 0.2 \mu m$  between  $\log(t_{50})$  and  $\log(\text{thickness})$ ; the slopes are -1.0.

B. The spatial gradient during onset and recovery for different synapse thicknesses.

**Fig. S6**

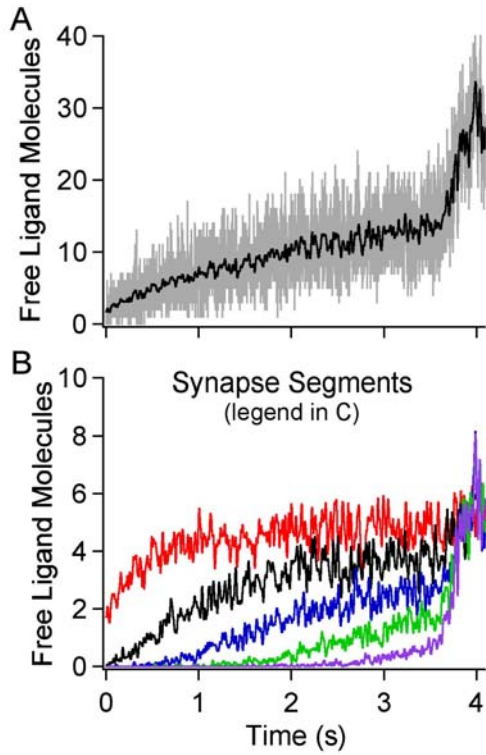

Diffusion of irreversible ligands into the box synapse. This simulation used the parameters from Table 1, except that  $\lambda_{-}$  is set to 0 so that bound ligands do not dissociate. Fig. 8 in the paper shows the corresponding receptor occupancy graphs.

A. Free ligands within synapse as a function of time. The gray trace shows the actual number, the black trace has been smoothed for purpose of display with a sliding average of 100 points.

B. Free ligands (smoothed with a sliding average of 100 points) as a function of time within the different segments of the box synapse.
